# Supplementary material for: Association between intrahepatic triglyceride content in subjects with metabolically healthy abdominal obesity and risks of pre-diabetes plus diabetes: an observational study
Source: HighWire-hosted journal article supplement (doi:10.1136/bmjopen-2021-057820), 2022-02-01
Supplement: bmjopen-2021-057820supp001_data_supplement.pdf [file bmjopen-2021-057820supp001_data_supplement.pdf]

**Title Page**

Manuscript Type: Original Article

**Association between intrahepatic triglyceride content in subjects with metabolically healthy abdominal obesity and risks of prediabetes plus diabetes:  
an observational study**

Qiaoyan Xu<sup>a#</sup>, Junfeng Zhang<sup>a#</sup>, Haiwei Han<sup>b#</sup>, Ning Chen<sup>c#</sup>, Fangfang Lai<sup>a</sup>, Yongwen Liu<sup>d</sup>,  
Caoxin Huang<sup>e</sup>, Mingzhu Lin<sup>f</sup>, Wei Zhang<sup>g</sup>, Shunqin Wang<sup>h</sup>, Changqin Liu<sup>f\*</sup>, Zhibin Li<sup>i\*</sup>

<sup>a</sup> Lianqian Community Health Service Center, The First Affiliated Hospital of Xiamen University, Xiamen, China

<sup>b</sup> Department of Radiology, The First Affiliated Hospital of Xiamen University, Xiamen, China

<sup>c</sup> Department of Endocrinology, Zhongshan Hospital, Fudan University (Xiamen Branch), Xiamen, China

<sup>d</sup> Department of Nursing, The First Affiliated Hospital of Xiamen University, Xiamen, China

<sup>e</sup> Xiamen Diabetes Institute, The First Affiliated Hospital of Xiamen University, Xiamen, China

<sup>f</sup> Department of Endocrinology and Diabetes, The First Affiliated Hospital of Xiamen University, Xiamen, China

<sup>g</sup> Xiamen Institute of Cardiovascular Diseases, The First Affiliated Hospital of Xiamen University, Xiamen, China

<sup>h</sup> Key laboratory of Neonatal Diseases, Children's Hospital of Fudan University Xiamen

Branch & Xiamen Children's Hospital, Xiamen, China

<sup>i</sup> Epidemiology Research Unit, Translational Medicine Research Center, The First Affiliated Hospital of Xiamen University, Xiamen, China

***Running title: Association of IHTG content in MHAO with prediabetes***

**Word count: 3356**

**Number of tables and figures: 5**

# These authors contribute to this work equally.

\* Corresponding authors and persons to whom reprint requests should be addressed:

Dr. Changqin Liu

Department of Endocrinology and Diabetes,

The First Affiliated Hospital, Xiamen University & The Teaching Hospital of Fujian

Medical University

No.55 Zhenhai Road, Xiamen 361003, China.

Phone: +86-592-2137610;

Fax: +86-592-2137557;

Email: liuchangqin@xmu.edu.cn

&

Dr. Zhibin Li

Epidemiology Research Unit,

Translational Medicine Research Center,

The First Affiliated Hospital, Xiamen University

No.55 Zhenhai Road, Xiamen 361003, China

Phone: +86-592-2137364;

Fax: +86-592-2137557;

Email: zhibinli33@hotmail.com

**ABSTRACT**

**Objective** We aimed to evaluate the association of intrahepatic triglyceride (IHTG) content in subjects with metabolically healthy abdominal obesity (MHAO) on risks of prediabetes plus diabetes.

**Design** Cross-sectional survey.

**Setting** Lianqian community, the First Affiliated Hospital of Xiamen University, Xiamen, China.

**Participants** Among 1,523 community-living healthy adults aged 40 years or older with abdominal obesity recruited at baseline, 428 subjects who underwent intrahepatic triglyceride (IHTG) content measurement were selected.

**Outcome measures** Risk of prediabetes plus diabetes.

**Results** Nonalcoholic fatty liver disease (NAFLD) was diagnosed as 203 (69.1%) in MHAO and 121 (90.3%) in metabolically unhealthy abdominal obesity (MUAO) ( $p<0.001$ ). The prevalence rates of prediabetes plus diabetes were 81.1%, 88.8% and 90.9% across the tertiles of IHTG content ( $p=0.037$ ). Both MUAO (v.s. MHAO) and NAFLD (v.s. Non-NAFLD) were independently associated with increased risks of prediabetes plus diabetes, the adjusted ORs (95% CIs) were 10.90 (3.15-37.69,  $p<0.001$ ) and 3.02 (1.47-6.20,  $p=0.003$ ), respectively. Higher IHTG content was significantly associated with increased risk of prediabetes plus diabetes with the adjusted OR (95% CI) of per SD increase of IHTG content of 1.62 (1.07-2.46,  $p=0.024$ ). And there was a significantly positive trend between increasing categories of IHTG content tertiles and excessive risks of prediabetes plus diabetes (trend test  $p$ -value =0.011). Stratified analyses showed similar results on the

associations of NAFLD and IHTG content with risks of prediabetes plus diabetes for subjects with MHAO but not for those with MUAO.

**Conclusions:** NAFLD and higher IHTG content were independently associated with increased risks of prediabetes plus diabetes in MHAO subjects. NAFLD or quantity of liver fat should be considered as additional criterion when defining and diagnosing MHO.

Screening of NAFLD and intervention to reduce liver fat should be strengthened even for those seemingly metabolically healthy obese.

**Keywords:** metabolically healthy obesity; intrahepatic triglyceride; nonalcoholic fatty liver disease; prediabetes; diabetes;

### Strengths and limitations of this study

- This study was a cross-sectional analysis of baseline information on the ongoing cohort study to evaluate the independent association of IHTG content with risk of prediabetes plus diabetes.
- All subjects were abdominally obese and were not randomly sampled from their living communities.
- IHTG content was determined using magnetic resonance spectroscopy which was relatively quantitative measurement of liver fat.
- The sample size was relatively small, especially for the MUAO subgroup, and we might not have enough power to determine their true associations.

## INTRODUCTION

The prevalence of diabetes has quadrupled during the past three decades with an estimated prevalence of 9.3% (463 million people) in 2019 and it is expected to rise to 10.2% (578 million) by 2030 and 10.9% (700 million) by 2045 [1-3]. Obesity has been well documented to be a risk factor for a broad array of chronic non-communicable diseases, including diabetes, hypertension, coronary heart disease, chronic kidney disease and certain sites of cancer [4-6]. A subgroup of obese individuals who are devoid of obesity-related metabolic complications, such as diabetes and atherosclerosis, arise the concept of metabolically healthy obese (MHO) [7-9]. However, there is no unique definition and diagnose criteria for MHO by now. For example, some defined MHO when two or fewer of the 4 criteria of metabolism syndrome [10] for those obese subjects while others defined as none of them [11], which made evidence on the association of MHO with diabetes was limited and controversial [12].

Nonalcoholic fatty liver disease (NAFLD) is well documented to be associated with risk of diabetes [13], however NAFLD has not been considered as additional criterion for MHO although it usually occurs simultaneously when obesity happens. Therefore, little evidence is available on the risk of NAFLD or liver fat with diabetes for those with MHO. In the present study with 428 community-living Chinese adults with abdominal obesity, we mainly aimed to evaluate associations of intrahepatic triglyceride (IHTG) content and NAFLD in subjects with metabolically healthy abdominal obesity (MHAO) on risks of prediabetes plus diabetes.

## METHODS

### Study design and subjects

Details on study design and subject recruitment have been described previously [14-16].

Briefly, 1,523 community-living healthy adults aged 40 years or older with abdominal obesity (waist circumference greater than 90 cm for men and 80 cm for women) living in Lianqian community, Xiamen, China were recruited at baseline of the cohort study in 2011. Of them, 92 (6%) who had incomplete data on clinical and biochemistry measurements were excluded, and a random sample of 428 subjects who underwent intrahepatic triglyceride (IHTG) content measurement was left for the present analysis (Figure 1). Of the 428 study subjects, 319 (74.5%) were female with the mean age of  $53.6\pm 6.5$  years old, 109 (25.5%) were male with the mean age of  $53.2\pm 7.1$  years old, and there was no significant difference in age between male and female subjects ( $p=0.592$ ). This study was approved by the Human Research Ethics Committee of the First Affiliated Hospital of Xiamen University (Xiamen, China) and conducted according to the principles of the Declaration of Helsinki. Written informed consent was obtained from each participant.

### Measurements

Details on study measurements have been described previously [15,16]. For each subject, face-to-face interview was conducted to collect socio-demographic status, lifestyle habits, present and previous history of health and medications. Subjects were excluded if they drank regularly with alcohol consumption  $\geq 140$  g/week for men or  $\geq 70$  g/week for women, had cancer, or received current treatment with systemic corticosteroids, biliary obstructive

diseases, acute or chronic virus hepatitis, drug-induced liver diseases, total parenteral nutrition, autoimmune hepatitis, Wilson's disease, known hyperthyroidism or hypothyroidism. Subjects underwent weight, height and waist circumference measurements by using a calibrated scale after removing shoes and heavy clothes. Waist circumference was measured at the midpoint between the inferior costal margin and the superior border of the iliac crest on the midaxillary line. Body mass index (BMI) was calculated as weight in kilograms divided by height in squared meters. Arterial blood pressure (BP) was measured with a mercury sphygmomanometer after sitting for at least 15 minutes.

Blood samples were obtained after 12-hour fasting and 75-g oral glucose tolerance test were conducted for each subject. All biochemical measurements were tested in the central laboratory of the First Affiliated Hospital, Xiamen University. Plasma glucose and serum lipid profiles, including triglyceride (TG), total cholesterol (TC), and high-density lipoprotein cholesterol (HDL-C) were determined on a HITACHI 7450 analyzer (HITACHI, Tokyo, Japan). Low-density lipoprotein cholesterol (LDL-C) was calculated by Friedewald's formula. Fasting plasma glucose (FPG) and 2-hour plasma glucose (2-h PG) concentrations were measured by the hexokinase method and HbA1c by the Bio-Rad Variant Hemoglobin A1c assay.

### **Ultrasonography and definition of non-alcoholic fatty liver disease**

**Details on ultrasonography and definition of NAFLD have been described previously [15,16].**

Hepatic ultrasonography scanning was performed by an experienced radiologist using GE LOGIQ P5 scanner (GE Healthcare, Milwaukee, USA) with a 4-MHz probe, who was



blinded to the subjects' health status. Hepatic steatosis was diagnosed on the basis of characteristic sonographic features, including hepatorenal echo contrast, liver parenchymal brightness, deep beam attenuation, and vessel blurring [17]. The definition of NAFLD was based on hepatic ultrasonography diagnosis of hepatic steatosis without excessive alcohol consumption, viral or autoimmune liver disease [15,16].

### **Intrahepatic triglyceride (IHTG) content measurement**

Details on intrahepatic triglyceride (IHTG) content measurement has been described previously [18]. IHTG content was determined by an experienced radiologist using Magnetic resonance spectroscopy ( $^1\text{H}$  MRS, 3.0-T Avanto, Siemens AG, Erlangen, German). Images of a sagittal, coronal and axial cube of a  $2\text{ cm}^3$  volume in the right lobe of liver was acquired. Quantification of the spectra (water and methylene resonances) was performed as described previously [19]. Areas of resonance from water protons and methylene groups in fatty acid chains were obtained with a time-domain non-linear fitting routine by using Syngo MR B15V software (Siemens AG). The percentage of IHTG content was calculated as the ratio of the area under the resonance of peak for methylene groups in fatty acid chains of IHTG and the combined area under the resonance peaks for both methylene groups and water [18,19].

### **Definition of metabolically healthy abdominal obesity**

Abdominal obesity was defined as WC  $\geq 90\text{cm}$  for men and  $80\text{cm}$  for women [20]. All subjects in the present study were abdominal obesity which was considered as one of the recruitment criteria. Subjects were defined as metabolically healthy abdominal obesity

(MHAO) if two or fewer of the following criteria were met: ①systolic BP  $\geq$  130 or diastolic BP  $\geq$  85 mmHg; ②fasting plasma glucose (FPG)  $\geq$  100 mg/dL (5.6 mmol/L); ③TG  $\geq$  150 mg/dL (1.7 mmol/L); ④HDL cholesterol  $<$  40 mg/dL (1.03 mmol/L) in men and  $<$  50 mg/dL (1.30 mmol/L) in women [16,21,22]. Otherwise, subjects meeting 3 or more of the criteria were defined as metabolically unhealthy abdominal obesity (MUAO). Therefore, all subjects in the present study were dichotomized as either MHAO or MUAO.

### **Definitions of diabetes and prediabetes**

According to American Diabetes Association (ADA) 2020 criteria, diabetes was defined as (1) a self-reported history of diabetes previously diagnosed by health care professionals; (2) FGP  $\geq$  126 mg/dL (7.0mmol/L); (3) 2-hour plasma glucose (2-h PG, OGTT)  $\geq$  200 mg/dL (11.1mmol/L); or (4) HbA1c  $\geq$  6.5%. Prediabetes was defined as (1) FPG levels between 100 mg/dL (5.6mmol/L) and 125 mg/ dL (6.9mmol/L), (2) 2-h PG levels between 140 mg/dL (7.8mmol/L) and 199 mg/dL (11.0mmol/L), or (3) HbA1c between 5.7% and 6.4% in participants without a prior diabetes diagnosis [15,16,23].

### **Statistical analyses**

Methods on statistical analyses were similar to our previous publications [15,16,18]. Data were presented as the mean  $\pm$  standard deviation for continuous variables or number and percentage for categorical variables. Skewness and kurtosis tests for continuous variables were conducted and found them followed approximation of normal distributions. Differences between subjects categorized by MHAO and tertiles of IHTG content were analyzed using

one-way ANOVA for continuous variables and chi-square test for categorical variables. Bar graphs showing prevalence rates of diabetes, prediabetes and normal glucose test (NGT) were made by MHAO (v.s. MUAO) and tertiles of IHTG content.

Multivariable logistic regression models were used to calculate the adjusted odds ratios (ORs) and 95% confidence intervals (CIs) of abdominal obesity (MUAO v.s. MHAO), NAFLD (yes v.s. no) and IHTG content (both the originally continuous values and the tertiles categories) for prediabetes plus diabetes with adjustment for potential confounders (including age, sex, educational level, smoking and drinking habits, regular physical exercise, BMI, systolic and diastolic BP, triglyceride, total cholesterol, HDL- and LDL-cholesterol and serum uric acid). And multivariable logistic regression analyses stratified by MHAO and MUAO groups were further conducted. All p-values were two-sided and p-value <0.05 was considered statistically significant. All statistical analyses were performed using Stata14.0 (StatCorp, College Station, TX).

### **Patient and public involvement**

There were no funds or time allocated for patient and public involvement.

## RESULTS

### Prevalence of diabetes and prediabetes stratified by MHAO and tertiles of IHTG

#### content

Among the 428 subjects with abdominal obesity, MHAO and MUAO were identified on 294 (68.7%) and 134 (31.3%) subjects. Of them, 46 (10.8%), 326 (76.2%) and 56 (13.1%) were diagnosed as diabetes, prediabetes and normal glucose tolerance (NGT), respectively. There was a significantly positive trend between increasing tertiles of IHTG content and higher prevalence of prediabetes plus diabetes (81.1%, 88.8% and 90.9% across the tertiles of IHTG content ( $p=0.037$ )). Figure 2A showed the prevalence rates of diabetes and prediabetes across the tertiles of IHTG content in MHAO subjects were 7.1% and 67.3%, 10.2% and 74.5%, 10.2% and 77.6% for the Tertile 1, Tertile 2 and Tertile 3, respectively ( $p\text{-value}>0.05$ ). But there was a significantly positive trend of higher prevalence of diabetes plus diabetes with increasing categories of tertiles of IHTG content ( $p=0.039$ ). Figure 2B showed the prevalence rates of diabetes and prediabetes across the tertiles of IHTG content in MUAO subjects were 8.9% and 86.7%, 8.9% and 88.9%, 25.0% and 72.7% for Tertile 1, Tertile 2 and Tertile 3, respectively. Table 1 also showed MUAO subjects had significantly higher prevalence of prediabetes and prediabetes plus diabetes than MHAO subjects (both  $p\text{-values}<0.05$ ).

### Demographic and clinical characteristics stratified by MHAO and tertiles of IHTG

#### content

For all the 428 subjects, the means ( $\pm$ SD) of age were 53.6 ( $\pm$ 6.5) years for women ( $n=319$ , 74.5%) and 53.2 ( $\pm$ 7.1) years for men ( $n=109$ , 25.5%) ( $p=0.592$ ). Table 1 showed differences

of demographics, life style habits and clinical characteristics stratified by MHAO and tertiles of IHTG content. For 294 MHAO subjects, with increasing categories of the tertiles of IHTG content (from tertile 1, tertile 2 to tertile 3), subjects were more likely to be male and had significantly higher levels of indices of obesity (BMI, waist circumference), diastolic BP, triglyceride, HbA1c, serum uric acid as well as higher prevalence of NAFLD and significantly lower level of HDL-C. As for 134 MUAO subjects, increasing categories of the tertiles of IHTG content were significantly related to higher prevalence of NAFLD and serum uric acid levels. Furthermore, Table 1 showed that, compared to subjects with MHAO, those with MUAO had significantly increased age, IHTG content, prevalence of NAFLD, systolic and diastolic BP, triglyceride, total cholesterol, FPG, 2-h PG, HbA1c, serum uric acid and significantly lower level of HDL-C.

#### **Associations of MHAO, NAFLD and IHTG content with prediabetes plus diabetes for all subjects**

Table 2 showed that, for all subjects, both MUAO (v.s. MHAO) and NAFLD (yes v.s. no) were independently associated with increased risk of prediabetes plus diabetes, and the adjusted ORs (95% CIs) were 10.90 (3.15-37.69,  $p < 0.001$ ) and 3.02 (1.47-6.20,  $p = 0.003$ ), respectively. Higher IHTG content was significantly associated with increased risk of prediabetes plus diabetes with the adjusted OR (95% CI) of per SD increase of IHTG content of 1.62 (1.07-2.46,  $p = 0.024$ ). With the tertile 1 of IHTG content as the reference, the tertile 3 showed significantly higher risk of prediabetes plus diabetes (adjusted OR (95% CI): 3.13 (1.28-7.61),  $p = 0.012$ ). And there was a significantly positive trend of increasing categories of

IHTG content tertiles with excessive risk of prediabetes plus diabetes (trend test:  $p=0.011$ ).

There was no significant interaction between MHAO with either NAFLD or tertiles of IHTG content for risk of prediabetes plus diabetes (both  $p$ -values  $>0.05$ ).

### **Stratified analyses on associations of NAFLD and IHTG content with prediabetes plus diabetes by MHAO & MUAO**

Multivariable logistic regression analyses stratified by MHAO and MUAO separately were conducted (Table 2). For MHAO subjects, NAFLD was independently associated with increased risk of prediabetes plus diabetes (adjusted OR (95%CI): 2.65 (1.25-5.60),  $p=0.011$ ).

Per SD increase of IHTG content was marginally associated with excessive risk of prediabetes plus diabetes with the adjusted OR (95%CI) of 1.55 (1.00-2.40,  $p=0.051$ ).

Compared with the tertile 1 of IHTG content, both the tertile 2 and tertile 3 groups showed significantly increased risks of prediabetes plus diabetes with the adjusted ORs (95%CI) of 2.31 (1.03-5.17,  $p=0.042$ ) and 2.81 (1.14-6.90,  $p=0.024$ ), respectively. And there was also a significantly positive trend between increasing categories of IHTG content tertiles and excessive risk of prediabetes plus diabetes (trend test:  $p=0.021$ ). For MUAO subjects, neither NAFLD nor IHTG content was found to be significantly associated with risk of prediabetes plus diabetes.

## DISCUSSION

In the present study of 428 subjects with abdominal obesity, 294 (68.7%) and 134 (31.3%) were identified as MHAO and MUAO, respectively. Both MUAO (v.s. MHAO) and NAFLD (v.s. Non-NAFLD) were independently associated with increased risks of prediabetes plus diabetes. Furthermore, higher IHTG content was significantly associated with increased risk of prediabetes plus diabetes, and there was a significantly positive trend between increasing categories of IHTG content tertiles and excessive risks of prediabetes plus diabetes. Stratified analyses showed similar results for subjects with MHAO but not for those with MUAO.

The concept of MHO has been established for a subgroup of obese subjects who do not exhibit metabolic and cardiovascular complications at a given time point, such as diabetes and atherosclerosis, for a few decades [24,25]. Compared to subjects with MUO, those with MHO are characterized by lower liver and visceral fat, higher subcutaneous leg fat, greater cardiorespiratory fitness, physical activity and insulin sensitivity, lower levels of inflammation, and normal adipose tissue function [26]. However, it could be debated whether MHO predicts the risk of diabetes compared with metabolically healthy normal weight or MUO. Hinnouho GM et al, based on the Whitehall II cohort study, found a significantly decreased risk of diabetes for MHO compared with metabolically unhealthy obesity (MUO) (HR=1.98 (MUO v.s. MHO), 95% CI: 1.39–2.83) [27]. The present study found similar results that MUAO was significantly associated with increased risk of prediabetes plus diabetes compared with MHAO but with a much higher adjusted

OR(95%CI) (10.90 (3.15-37.69)). Hinnouho GM et al and others further found that MHO showed a significant increased risk of T2DM incidence compared with metabolically healthy normal weight [27-29]. We cannot evaluate the risk of MHAO on diabetes compared with metabolically healthy normal weight since all the subjects in the present study were central obese and none of them could be classified as metabolically healthy or unhealthy normal weight. And because we had a relatively small sample size, we might find the adjusted OR was much higher than those from other [27-29].

Little evidence is available on differences of prevalence of NAFLD or liver fat content between MHO and MUO. In the present study, we found subjects with MUO, compared to those with MHO, showed significantly higher prevalence of NAFLD (90.3% v.s. 69.1%) and IHTG content ( $16.3\pm 9.5$  v.s.  $12.3\pm 9.5\%$ ) (both p-values<0.001). Our findings indicated the prevalence of NAFLD and IHTG content are still common and high even for those with MHO. Meanwhile MHO is commonly identified based on the presence of obesity and absence of metabolic syndrome, neither NAFLD nor liver fat content has been considered as an additional criterion when defining and diagnosing MHO. Therefore, our findings implied that screening of NAFLD and intervention to reduce IHTG content for those seemingly healthy obese should be strengthened.

**Our previous findings showed that NAFLD was significantly associated with increased risk of T2DM prevalence [15].** The present study expanded the positive association of NAFLD to risk of prediabetes plus diabetes for all subjects as well as for those with MHAO, and the



adjusted ORs (95%CI) were 3.02 (1.47-6.20) and 2.65 (1.25-5.60) (both p-values<0.05), respectively. NAFLD has been generally diagnosed by hepatic ultrasonography scanning. In the present study, we conducted IHTG content measurement by using magnetic resonance spectroscopy to quantify the extent of liver fat in these abdominal obese subjects. And we found that IHTG content was significantly associated with increased risk of prediabetes plus diabetes with the adjusted OR (95%CI) of per SD increase of IHTG content of 1.62 (1.07-2.46, p=0.024). Moreover, we found a significantly positive trend between increasing categories of IHTG content tertiles and excessive risks of prediabetes plus diabetes.

Quantitative MRI proton-density fat fraction method has been proved to serve as accurate noninvasive biomarkers for quantifying liver steatosis [30] and liver fat content was found to be correlated with insulin resistance [31], but evidence was scarce on association between the quantity of liver fat and risk of diabetes. Our results on the association between IHTG content and risks of prediabetes plus diabetes might account for possibly a novel finding for the present study.

We further conducted stratified analyses on the associations of IHTG content with risk of prediabetes plus diabetes for subjects with MHAO and MUAO separately. For those with MHAO, the association of IHTG content with risk of prediabetes plus diabetes was marginally significant, and the adjusted OR (95%CI) of per SD increase of IHTG content was 1.55 (1.00-2.40, p=0.051). With the first tertile of IHTG content as the reference group, the adjusted ORs (95%CI) of risks of prediabetes plus diabetes for the 2nd and 3rd tertiles

were 2.31 (1.03-5.17) and 2.81 (1.14-6.90) (both p-values<0.05), respectively. The positive trend between increasing categories of IHTG content tertiles and excessive risks of prediabetes plus diabetes was also statistically significant for the subgroup with MHAO (trend test p-value<0.05). Our findings implied that increased intrahepatic triglyceride content was associated with excessive risk of prediabetes and diabetes even for MHO subjects. To the best of our knowledge, we were probably the first to find the positive associations of IHTG content with risks of diabetes and prediabetes for MHAO subjects. The reason for non-significant results for MUAO subgroups may be due to the relatively small sample size of subjects with MUAO (n=134).

**NAFLD and liver fat quantity has not been currently considered in the definitions and diagnose criteria of MHO [16,26], although liver is one of the main parts of fat accumulation when obesity occurs.** The present study found that around 69% of subjects with MHAO were diagnosed as NAFLD. Most importantly, even for these apparently metabolically healthy obese individuals, NAFLD and higher IHTG content were both significantly associated with increased risks of prediabetes plus diabetes. Therefore, our findings implied that the current criteria of MHO may not be appropriate. NAFLD, quantity of liver fat or abdominal fat content (obtained from ultrasonography or CT-scanning techniques) should be considered as additional criterion when defining and diagnosing MHO if more evidence could be proved in future, especially from the prospective cohort studies with larger sample sizes.

A few limitations of the present study should be recognized when generalizing our findings to other populations. Firstly, all subjects were abdominally obese and were not randomly sampled from their living communities; therefore, we could not assess the effect of MHAO as compared with metabolically healthy non-obesity and we might also under-estimate the true associations of MHAO as compared with MUAO on risks of prediabetes plus diabetes. Secondly, the present analyses were based on the baseline information of our ongoing cohort study, therefore we cannot determine the temporal sequence among MHAO and prediabetes plus diabetes. Thirdly, our sample size was small, especially for the MUAO subgroup and we may not have enough power to determine their true associations. On the other hand, we still have some strengths in the present study. For example, we used IHTG content by magnetic resonance spectroscopy, which was relatively measurement of liver fat. And we were probably the first to find the positive associations of IHTG content with risks of diabetes and prediabetes, especially for subjects with MHAO.

## CONCLUSIONS

NAFLD were diagnosed in 69% of MHAO and 90% of MUAO subjects, and the prevalence rates of prediabetes plus diabetes were linearly increased across the tertiles of IHTG content. NAFLD and higher IHTG content were independently associated with increased risks of prediabetes plus diabetes for all subjects as well as for the MHAO subgroups. Therefore, our findings imply that NAFLD or quantity of liver fat should be considered as additional criterion when defining and diagnosing MHO. Furthermore, screening of NAFLD and intervention to reduce liver fat should be strengthened even for the seemingly healthy obese

subjects.

**Declarations****Acknowledgements**

This study was completed with the assistance of the Lianqian community health service center, Xiamen, China. And we are grateful to all the subjects for their participation.

**Author contributions**

Q.X., J.Z., H.H., N.C. and Z.L. performed the statistical analysis and wrote the manuscript; H.H., F.L., Y.L., M.L. and C.H. participated in the data collection; S.W. and W.Z. contributed to discussion; C.L., N.C., S.W. and J.Z. participated in the design of the study and edited the manuscript. C.L. and Z.L. are the guarantors of this work and, as such, had full access to all the data in the study and take responsibility for the integrity of the data and the accuracy of the data analysis.

**Funding**

This study was supported by the grants from National Key R&D Program of China (No. 2017YFC0907100), Natural Science Foundation of China (No. 81870611), Natural Science Foundation of Fujian Province (2019J01569), Open project of State Key Laboratory of Cellular Stress Biology, and Xiamen University (No. SKLCSB2019KF004).

**Conflict of interest statement**

No potential conflict of interest relevant to this article is declared.

**Ethical approval**

This study was approved by the Human Research Ethics Committee of the First Affiliated Hospital of Xiamen University (Xiamen, China) (number/ID of the obtained ethics

approval: 2011YLS-013) and conducted according to the principles of the Declaration of Helsinki. Written informed consent was obtained from each participant.

**Data availability**

The datasets generated during and/or analyzed during the current study are available from the corresponding author upon reasonable request.

## Reference

- [1] Saeedi P, Petersohn I, Salpea P, et al. Global and regional diabetes prevalence estimates for 2019 and projections for 2030 and 2045: Results from the International Diabetes Federation Diabetes Atlas, 9(th) edition. *Diabetes Res Clin Pract* 2019;157:107843.
- [2]. Zheng Y, Ley SH, Hu FB. Global aetiology and epidemiology of type 2 diabetes mellitus and its complications. *Nat Rev Endocrinol* 2018;14(2):88-98.
- [3] Chatterjee S, Khunti K, Davies MJ. Type 2 diabetes. *Lancet* 2017;389(10085):2239-51.
- [4] Legler J, Fletcher T, Govarts E, et al. Obesity, diabetes, and associated costs of exposure to endocrine-disrupting chemicals in the European Union. *J Clin Endocrinol Metab* 2015;100(4):1278-88.
- [5] Collaborators GBDO, Afshin A, Forouzanfar MH, et al. Health Effects of Overweight and Obesity in 195 Countries over 25 Years. *N Engl J Med* 2017;377(1):13-27.
- [6] Prospective Studies C, Whitlock G, Lewington S, et al. Body-mass index and cause-specific mortality in 900 000 adults: collaborative analyses of 57 prospective studies. *Lancet* 2009;373(9669):1083-96.
- [7] Vague J. The degree of masculine differentiation of obesities: a factor determining predisposition to diabetes, atherosclerosis, gout, and uric calculous disease. *Am J Clin Nutr* 1956;4(1):20-34.
- [8] Sims EA. Are there persons who are obese, but metabolically healthy? *Metabolism* 2001;50(12):1499-504.
- [9] Stefan N, Haring HU, Hu FB, et al. Metabolically healthy obesity: epidemiology, mechanisms, and clinical implications. *Lancet Diabetes Endocrinol* 2013;1(2):152-62.
- [10] Alberti KG, Eckel RH, Grundy SM, et al. Harmonizing the metabolic syndrome: a joint

interim statement of the International Diabetes Federation Task Force on Epidemiology and Prevention; National Heart, Lung, and Blood Institute; American Heart Association; World Heart Federation; International Atherosclerosis Society; and International Association for the Study of Obesity. *Circulation* 2009;120(16):1640-5.

- [11] Zhao Y, Qin P, Sun H, et al. Metabolically healthy general and abdominal obesity are associated with increased risk of hypertension. *Br J Nutr* 2020;123(5):583-91.
- [12] Bell JA, Kivimaki M, Hamer M. Metabolically healthy obesity and risk of incident type 2 diabetes: a meta-analysis of prospective cohort studies. *Obes Rev* 2014;15(6):504-15.
- [13] Targher G, Byrne CD. Clinical Review: Nonalcoholic fatty liver disease: a novel cardiometabolic risk factor for type 2 diabetes and its complications. *J Clin Endocrinol Metab* 2013;98(2):483-95.
- [14] Yan B, Shi X, Zhang H, et al. Association of serum irisin with metabolic syndrome in obese Chinese adults. *PLoS One* 2014;9(4):e94235.
- [15] Li Z, Lin M, Liu C, et al. Fetuin-B links nonalcoholic fatty liver disease to type 2 diabetes via inducing insulin resistance: Association and path analyses. *Cytokine*. 2018;108:145-150.
- [16] Zhang J, Xu Q, Lai F, et al. Joint associations of metabolically healthy abdominal obesity and non-alcoholic fatty liver disease with prediabetes and diabetes in Chinese adults. *BMJ Open Diabetes Research and Care* 2021;9:e002362.
- [17] Jian-gao F, Chinese Liver Disease A. Guidelines for management of nonalcoholic fatty liver disease: an updated and revised edition. *Zhonghua Gan Zang Bing Za Zhi* 2010;18(3):163-6



- [18] Wang D, Liu Y, Liu S, et al. Serum fetuin-B is positively associated with intrahepatic triglyceride content and increases the risk of insulin resistance in obese Chinese adults: A cross-sectional study. *J Diabetes*. 2018;10(7):581-588.
- [19] Frimel TN, Deivanayagam S, Bashir A, et al. Assessment of intrahepatic triglyceride content using magnetic resonance spectroscopy. *J Cardiometab Syndr* 2007;2(2):136-8.
- [20] Zhou BF, Cooperative Meta-Analysis Group of the Working Group on Obesity in C. Predictive values of body mass index and waist circumference for risk factors of certain related diseases in Chinese adults--study on optimal cut-off points of body mass index and waist circumference in Chinese adults. *Biomed Environ Sci* 2002;15(1):83-96.
- [21] Alberti KG, Zimmet P, Shaw J, et al. The metabolic syndrome--a new worldwide definition. *Lancet* 2005;366(9491):1059-62.
- [22] Fingeret M, Marques-Vidal P, Vollenweider P. Incidence of type 2 diabetes, hypertension, and dyslipidemia in metabolically healthy obese and non-obese. *Nutr Metab Cardiovasc Dis* 2018;28(10):1036-44.
- [23] American Diabetes A. 2. Classification and Diagnosis of Diabetes: Standards of Medical Care in Diabetes-2020. *Diabetes Care* 2020;43(Suppl 1):S14-S31.
- [24] Stefan N, Haring HU, Schulze MB. Metabolically healthy obesity: the low-hanging fruit in obesity treatment? *Lancet Diabetes Endocrinol* 2018;6(3):249-58.
- [25] Stefan N, Kantartzis K, Machann J, et al. Identification and characterization of metabolically benign obesity in humans. *Arch Intern Med* 2008;168(15):1609-16.
- [26] Blüher M. Metabolically Healthy Obesity. *Endocr Rev* 2020;41(3): 405–420

- [27] Hinnouho GM, Czernichow S, Dugravot A, et al. Metabolically healthy obesity and the risk of cardiovascular disease and type 2 diabetes: the Whitehall II cohort study. *Eur Heart J* 2015;36(9):551-9.
- [28] Wei Y, Wang J, Han X, et al. Metabolically healthy obesity increased diabetes incidence in a middle-aged and elderly Chinese population. *Diabetes Metab Res Rev* 2020;36(1):e3202.
- [29] Gaita D, Mosteoru S. Metabolically healthy versus unhealthy obesity and risk for diabetes mellitus and cardiovascular diseases. *Cardiovasc Endocrinol* 2017;6(1):23-26.
- [30] Kramer H, Pickhardt PJ, Kliewer MA, et al. Accuracy of Liver Fat Quantification With Advanced CT, MRI, and Ultrasound Techniques: Prospective Comparison With MR Spectroscopy. *AJR Am J Roentgenol* 2017;208(1):92-100.
- [31] Dong Z, Luo Y, Cai H, et al. Noninvasive fat quantification of the liver and pancreas may provide potential biomarkers of impaired glucose tolerance and type 2 diabetes. *Medicine (Baltimore)* 2016;95(23):e3858.

**Figure Legends**

Figure 1. Study subjects' selection diagram.

Figure 2A. Prevalence rates (%) of prediabetes and diabetes stratified by Tertiles of IHTG content in MHAO subjects.

Figure 2B. Prevalence rates (%) of prediabetes and diabetes stratified by Tertiles of IHTG content in MUAO subjects.

**Table Legends**

Table 1. Demographic, lifestyle and clinical characteristics of 428 subjects stratified by MHAO and tertiles of IHTG content.

Table 2. Adjusted odds ratios (ORs) with associated 95% confidence interval (CI) of MUAO, NAFLD and IHTG content for prediabetes plus diabetes.

Table 1. Demographic, lifestyle and clinical characteristics of 428 subjects stratified by MHAO and tertiles of IHTG content.

| Variables                            | MHAO (n=294, 68.7%) |            |            |                     | MUAO (n=134, 31.3%) |            |             |                     | P-value <sub>§</sub> |
|--------------------------------------|---------------------|------------|------------|---------------------|---------------------|------------|-------------|---------------------|----------------------|
|                                      | Tertile 1           | Tertile 2  | Tertile 3  | P-value             | Tertile 1           | Tertile 2  | Tertile 3   | P-value             |                      |
| <b>Demographics &amp; life style</b> |                     |            |            |                     |                     |            |             |                     |                      |
| N (%)                                | 98 (33.3%)          | 98 (33.3%) | 98 (33.3%) |                     | 45 (33.6%)          | 45 (33.6%) | 44 (32.8%)  |                     |                      |
| Male gender (n, %)                   | 12 (12.4%)          | 27 (27.6%) | 30 (30.6%) | 0.005*              | 11 (24.4%)          | 17 (38.8%) | 12 (27.3%)  | 0.347               | 0.160                |
| Age (years)                          | 52.8±6.5            | 53.6±6.6   | 52.4±6.8   | 0.422               | 54.8±6.1            | 54.1±7.5   | 55.0±6.0    | 0.821               | 0.014*               |
| Low educational attainment, (n, %)   | 61 (62.2%)          | 48 (49.0%) | 51 (52.0%) | 0.241               | 30 (66.7%)          | 25 (55.6%) | 27 (61.4%)  | 0.110               | 0.090                |
| Ever smoking (n, %)                  | 16 (16.3%)          | 25 (25.5%) | 23 (23.5%) | 0.262               | 9 (20.0%)           | 11 (24.4%) | 11 (25.0%)  | 0.828               | 0.753                |
| Ever drinking (n, %)                 | 8 (8.2%)            | 13 (13.3%) | 15 (15.3%) | 0.291               | 2 (4.4%)            | 6 (13.3%)  | 4 (9.1%)    | 0.216               | 0.317                |
| Regular physical exercise (n, %)     | 34 (34.7%)          | 42 (42.9%) | 32 (32.7%) | 0.292               | 13 (28.9%)          | 17 (37.8%) | 10 (22.7%)  | 0.296               | 0.165                |
| <b>Clinical characteristics</b>      |                     |            |            |                     |                     |            |             |                     |                      |
| IHTG content (%)                     | 4.10±1.63           | 9.64±1.97  | 23.25±8.47 | <0.001 <sup>†</sup> | 6.86±2.44           | 14.54±2.91 | 27.68±6.21  | <0.001 <sup>†</sup> | <0.001 <sup>†</sup>  |
| NAFLD (n, %)                         | 34 (34.7%)          | 75 (76.5%) | 94 (95.9%) | <0.001 <sup>†</sup> | 35 (77.8%)          | 42 (93.3%) | 44 (100.0%) | <0.001 <sup>†</sup> | <0.001 <sup>†</sup>  |
| BMI (kg/m <sup>2</sup> )             | 26.2±2.5            | 27.2±2.5   | 28.3±2.7   | <0.001 <sup>†</sup> | 27.3±2.5            | 27.7±3.5   | 28.1±2.8    | 0.485               | 0.121                |
| Waist circumference (cm)             | 90.7±5.1            | 93.5±6.1   | 96.0±7.1   | <0.001 <sup>†</sup> | 94.0±5.3            | 93.7±7.8   | 95.3±6.8    | 0.518               | 0.158                |
| Systolic blood pressure (mmHg)       | 125.6±17.3          | 130.6±17.5 | 129.5±15.7 | 0.095               | 139.8±12.4          | 140.9±15.3 | 143.4±12.6  | 0.451               | <0.001 <sup>†</sup>  |
| Diastolic blood pressure (mmHg)      | 74.0±10.0           | 77.8±9.8   | 78.4±9.7   | 0.004*              | 82.7±10.7           | 83.7±9.4   | 85.2±8.3    | 0.482               | <0.001 <sup>†</sup>  |
| Triglyceride (mmol/L)                | 1.22±0.57           | 1.56±0.82  | 1.89±0.98  | <0.001 <sup>†</sup> | 2.53±1.26           | 3.32±1.90  | 2.84±1.52   | 0.062               | <0.001 <sup>†</sup>  |
| Total cholesterol (mmol/L)           | 5.80±1.03           | 5.81±0.95  | 5.95±1.05  | 0.487               | 6.18±1.43           | 6.13±1.27  | 6.02±0.94   | 0.823               | 0.024*               |
| HDL-cholesterol (mmol/L)             | 1.50±0.26           | 1.39±0.29  | 1.37±0.25  | 0.003*              | 1.20±0.19           | 1.14±0.22  | 1.18±0.20   | 0.401               | <0.001 <sup>†</sup>  |
| LDL-cholesterol (mmol/L)             | 3.75±0.95           | 3.72±0.79  | 3.75±1.01  | 0.973               | 3.83±1.30           | 3.50±1.41  | 3.56±0.84   | 0.391               | 0.297                |

|                                       |                  |                  |                  |                     |                  |                  |                   |                     |                     |
|---------------------------------------|------------------|------------------|------------------|---------------------|------------------|------------------|-------------------|---------------------|---------------------|
| Blood uric acid ( $\mu\text{mol/L}$ ) | 322.9 $\pm$ 71.5 | 359.8 $\pm$ 83.6 | 378.2 $\pm$ 98.1 | <0.001 <sup>†</sup> | 348.3 $\pm$ 84.2 | 381.6 $\pm$ 90.9 | 426.0 $\pm$ 108.7 | <0.001 <sup>†</sup> | 0.001*              |
| Fasting plasma glucose (mmol/L)       | 5.56 $\pm$ 0.46  | 5.55 $\pm$ 0.54  | 5.54 $\pm$ 0.51  | 0.967               | 5.85 $\pm$ 0.44  | 5.98 $\pm$ 0.45  | 5.94 $\pm$ 0.42   | 0.338               | <0.001 <sup>†</sup> |
| 2-h PG (OGTT, mmol/L)                 | 7.42 $\pm$ 2.52  | 7.51 $\pm$ 1.86  | 7.87 $\pm$ 1.88  | 0.285               | 8.04 $\pm$ 1.91  | 8.09 $\pm$ 1.72  | 8.87 $\pm$ 2.13   | 0.082               | <0.001 <sup>†</sup> |
| HbA1c (%)                             | 5.86 $\pm$ 0.29  | 5.93 $\pm$ 0.36  | 5.97 $\pm$ 0.29  | 0.041*              | 6.01 $\pm$ 0.32  | 6.00 $\pm$ 0.38  | 6.04 $\pm$ 0.36   | 0.882               | 0.005*              |
| Diabetes (n, %)                       | 7 (7.1%)         | 10 (10.2%)       | 10 (10.2%)       | 0.693               | 4 (8.9%)         | 4 (8.9%)         | 11 (25.0%)        | 0.043*              | 0.122               |
| Prediabetes (n, %)                    | 66 (67.3%)       | 73 (74.5%)       | 76 (77.6%)       | 0.255               | 39 (86.7%)       | 40 (88.9%)       | 32 (72.7%)        | 0.091               | 0.039*              |
| Prediabetes plus diabetes (n, %)      | 73 (74.5%)       | 83 (84.7%)       | 86 (87.8%)       | 0.039*              | 43 (95.6%)       | 44 (97.8%)       | 43 (97.7%)        | 0.779               | <0.001 <sup>†</sup> |

\* p<0.05, <sup>†</sup>p<0.001, <sup>§</sup>P-value for difference between MHAO and MUAO.

All percentages are column percentage; except for percentages, all values are mean $\pm$ s.d. .

Abbreviations: 2-h PG, 2-hour plasma glucose; BMI, body mass index; HDL, high-density lipoprotein; IHTG, intrahepatic triglyceride; LDL, low-density lipoprotein cholesterol; MHAO, metabolically healthy abdominal obesity; MUAO, metabolically unhealthy abdominal obesity; NAFLD, non-alcoholic fatty liver disease; OGTT, oral glucose tolerance test.

Table 2. Adjusted odds ratios (ORs) with associated 95% confidence interval (CI) of MUAO, NAFLD and IHTG content for prediabetes plus diabetes.

| Variables               | Prediabetes plus Diabetes |               |         |
|-------------------------|---------------------------|---------------|---------|
|                         | OR                        | 95% CI        | P-value |
| <b>All subjects</b>     |                           |               |         |
| MUAO v.s. MHAO          | 10.90                     | 3.15 - 37.69  | <0.001* |
| NAFLD v.s. Non-NAFLD    | 3.02                      | 1.47 - 6.20   | 0.003*  |
| IHTG content (%) †      | 1.62                      | 1.07 - 2.46   | 0.024*  |
| IHTG content tertiles ‡ |                           |               |         |
| Tertile 1               | 1.00                      |               |         |
| Tertile 2               | 1.81                      | 0.86 - 3.81   | 0.117   |
| Tertile 3               | 3.13                      | 1.28 - 7.61   | 0.012*  |
| Trend test              |                           |               | 0.011*  |
| Interaction test        |                           |               |         |
| MUAO*NAFLD              |                           |               | 0.956   |
| MUAO*Tertiles of IHTG   |                           |               | 0.869   |
| <b>MHAO subjects</b>    |                           |               |         |
| NAFLD v.s. Non-NAFLD    | 2.65                      | 1.25 - 5.60   | 0.011*  |
| IHTG content (%) †      | 1.55                      | 1.00 - 2.40   | 0.051   |
| IHTG content tertiles ‡ |                           |               |         |
| Tertile 1               | 1.00                      |               |         |
| Tertile 2               | 2.31                      | 1.03 - 5.17   | 0.042*  |
| Tertile 3               | 2.81                      | 1.14 - 6.90   | 0.024*  |
| Trend test              |                           |               | 0.021*  |
| <b>MUAO subjects</b>    |                           |               |         |
| NAFLD v.s. Non-NAFLD    | 4.77                      | 0.07 - 327.48 | 0.469   |
| IHTG content (%) †      | 0.81                      | 0.13 - 5.26   | 0.830   |
| IHTG content tertiles ‡ |                           |               |         |
| Tertile 1               | 1.00                      |               |         |
| Tertile 2               | 3.22                      | 0.24 - 43.54  | 0.378   |
| Tertile 3               | 1.90                      | 0.15 - 23.69  | 0.620   |
| Trend test              |                           |               | 0.558   |

\*p<0.05

† OR and 95%CI was expressed by per SD increase of IHTG content.

‡ OR and 95%CI was expressed by the first quartile of IHTG content as the reference.

Abbreviations: CI, confidence interval; IHTG, intrahepatic triglyceride; MHAO, metabolically healthy abdominal obesity; MUAO, metabolically unhealthy abdominal obesity; NAFLD, non-alcoholic fatty liver disease; OR, odds ratio;

OR was adjusted for age, sex, educational level, ever smoking, ever drinking, physical

activity, BMI, systolic and diastolic BP, triglyceride, total cholesterol, HDL- and LDL-cholesterol and serum uric acid.
